# Supplementary material for: Role of oxidation of excitation-contraction coupling machinery in age-dependent loss of muscle function in Caenorhabditis elegans
Source: eLife journal article supplement (doi:10.7554/elife.75529), 2022-05-04

Full uncut gels for Figure 1

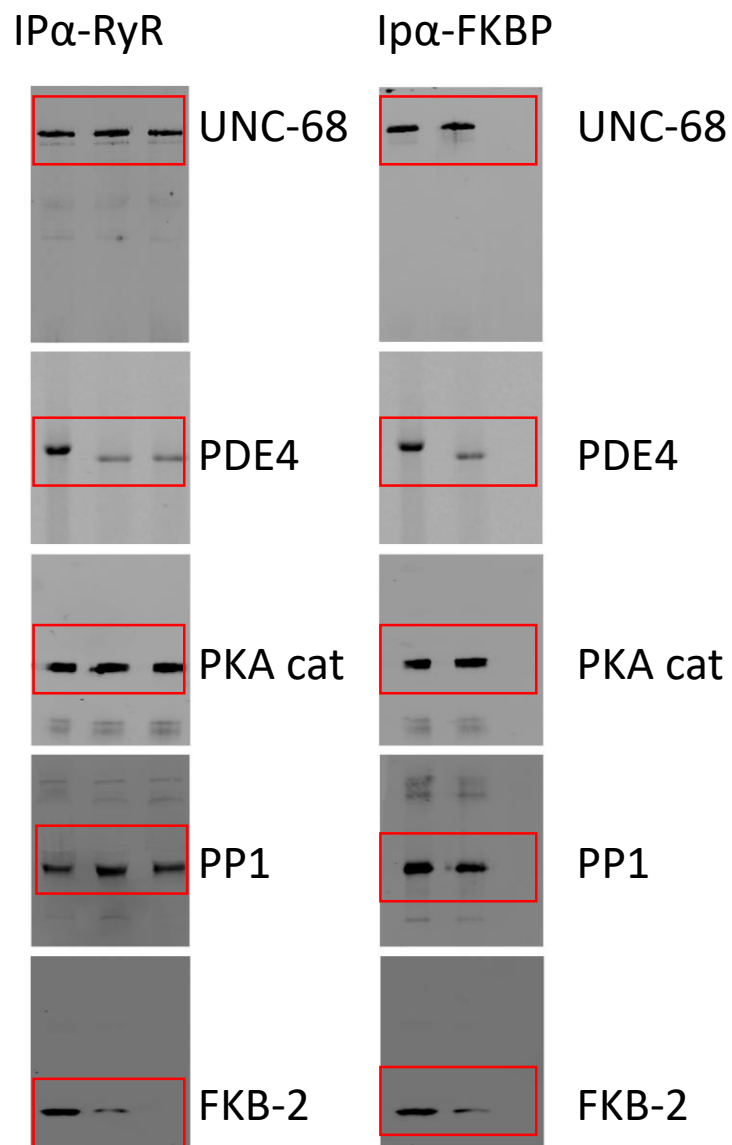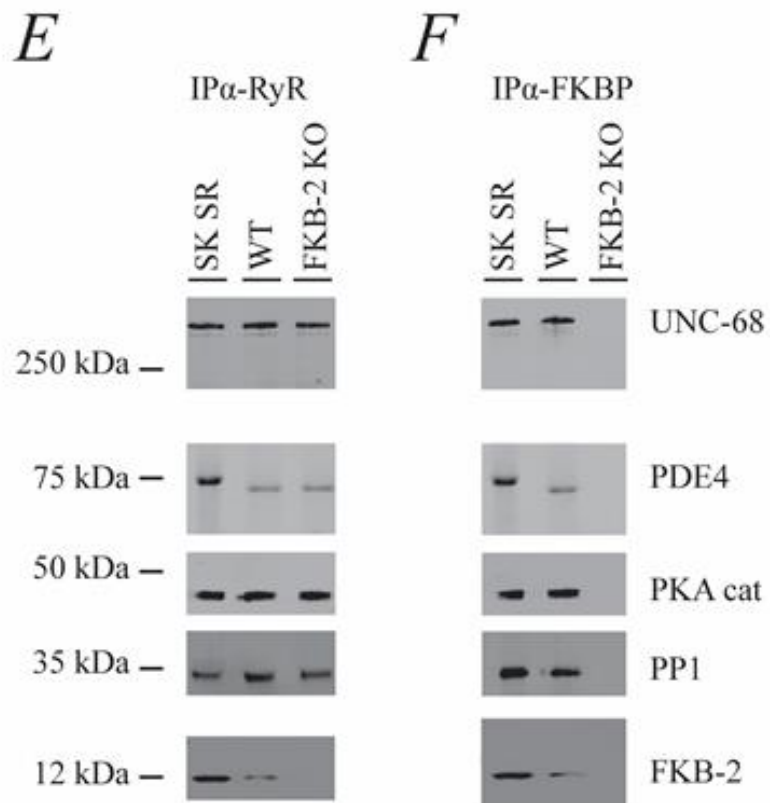

Supplement: supp [file elife-75529-supp-v1.zip]
